# Supplementary material for: Transcriptome Analysis Identifies Candidate Target Genes Involved in Glyphosate-Resistance Mechanism in Lolium multiflorum
Source: PubMed Central journal article supplement (PMC7357135; doi:10.3390/plants9060685), 2020-05-28
Supplement: plants-09-00685-s001.pdf [file plants-09-00685-s001.pdf]

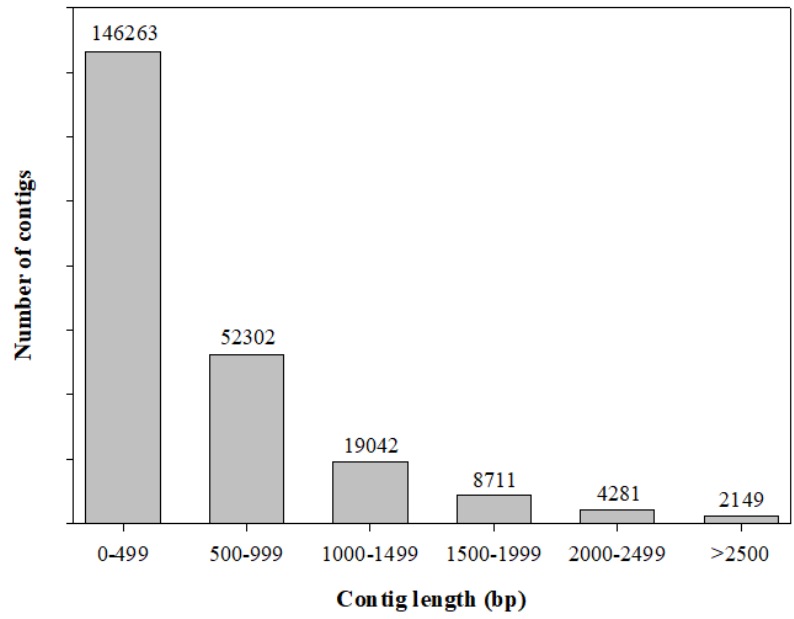

**Supplementary Figure 1.** Length distribution of transcripts assembled from RNA-Seq libraries of glyphosate-resistant and -sensitive biotypes of *Lolium multiflorum*.

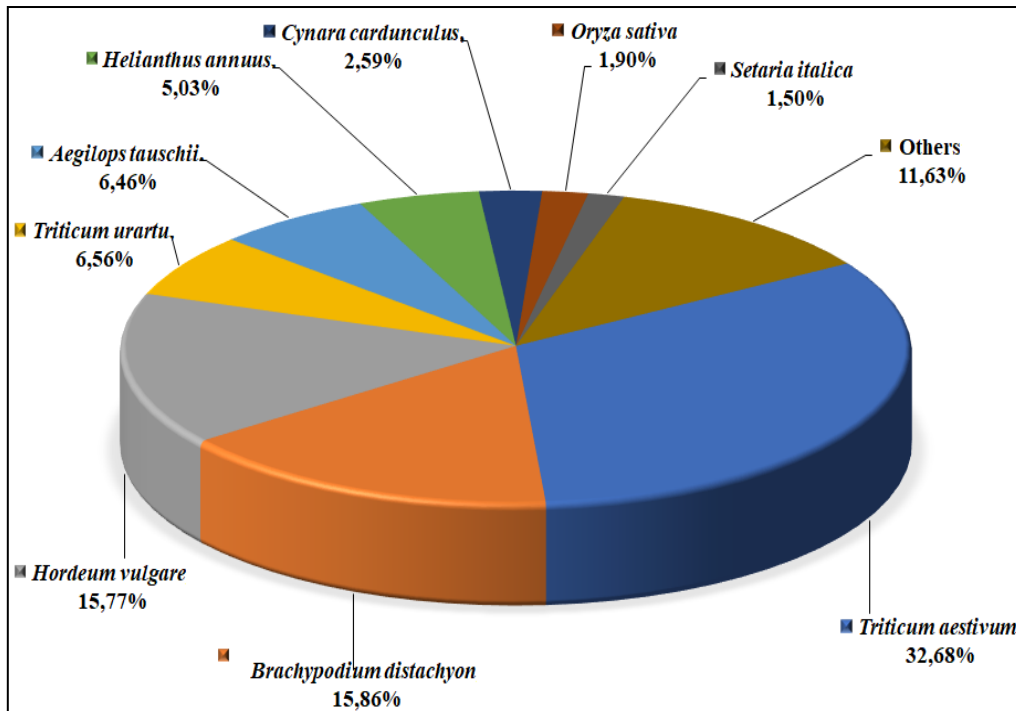

**Supplementary Figure 2.** Sequence comparison to other plants (hit  $\geq 1\%$ ) from the distribution of BLASTx hits (e-value  $< 1e-10$ ) against the non-redundant protein database of the National Center for Biotechnology Information (NCBI).

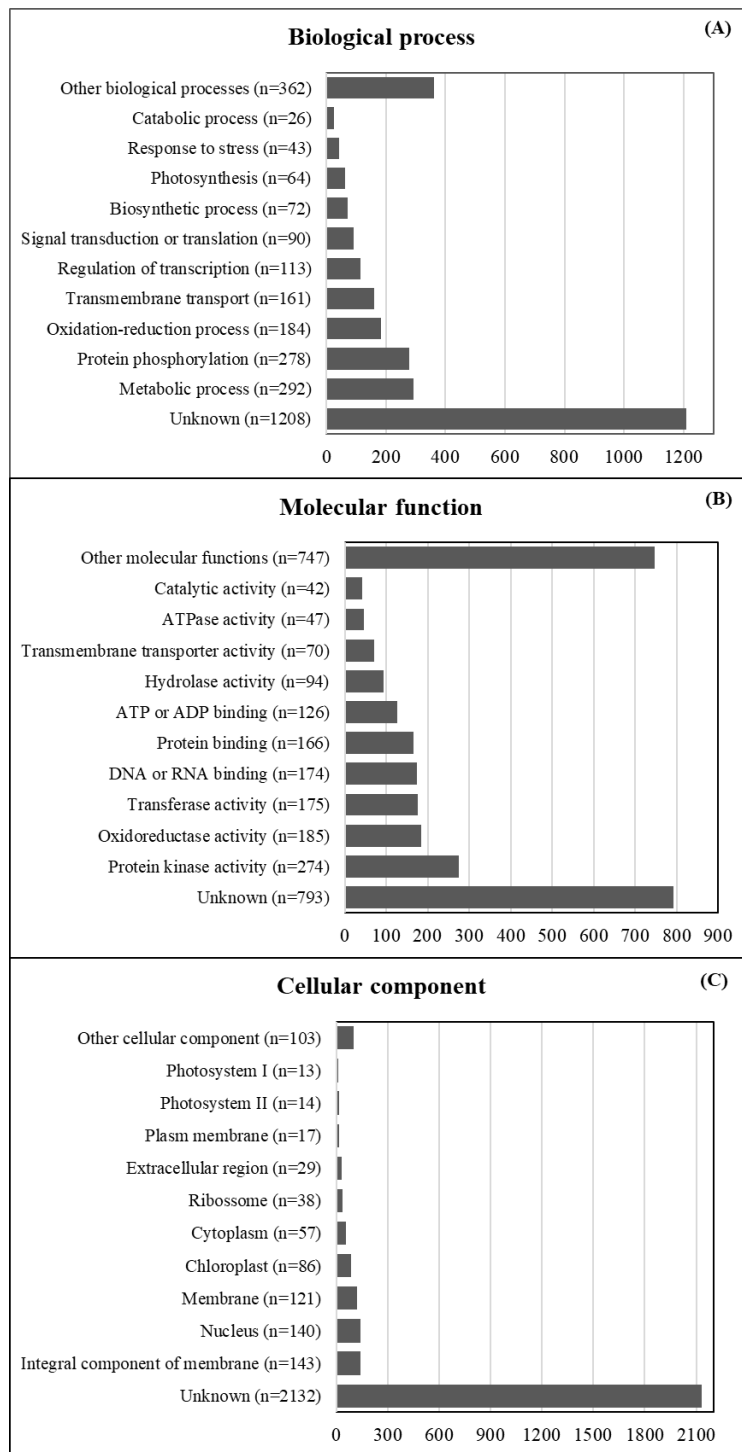

**Supplementary Figure 3.** Top twelve Gene Ontology (GO) terms identified in the *Lolium multiflorum* transcriptome assembly summarized in three main categories: (A) biological process, (B) molecular function, and (C) cellular component.

**(A)**

| Amino acid position                      | 100 | 101 | 102 | 103 | 105 | 106 | 107 |
|------------------------------------------|-----|-----|-----|-----|-----|-----|-----|
| EPSPS sequence                           | GCT | GGA | ACT | GCG | CGG | CCA | TTG |
| Translation ORF/CDS                      | A   | G   | T   | A   | R   | P   | L   |
| <i>Arabidopsis thaliana</i> <sup>1</sup> | A   | G   | T   | A   | R   | P   | L   |
| <i>Lolium multiflorum</i> <sup>2</sup>   | A   | G   | T   | A   | R   | P   | L   |
| <i>Zea mays</i> <sup>3</sup>             | A   | G   | T   | A   | R   | P   | L   |
| <i>L. multiflorum</i> GS                 | A   | G   | T   | A   | R   | P   | L   |
| <i>L. multiflorum</i> GR                 | A   | G   | T   | A   | R   | P   | L   |

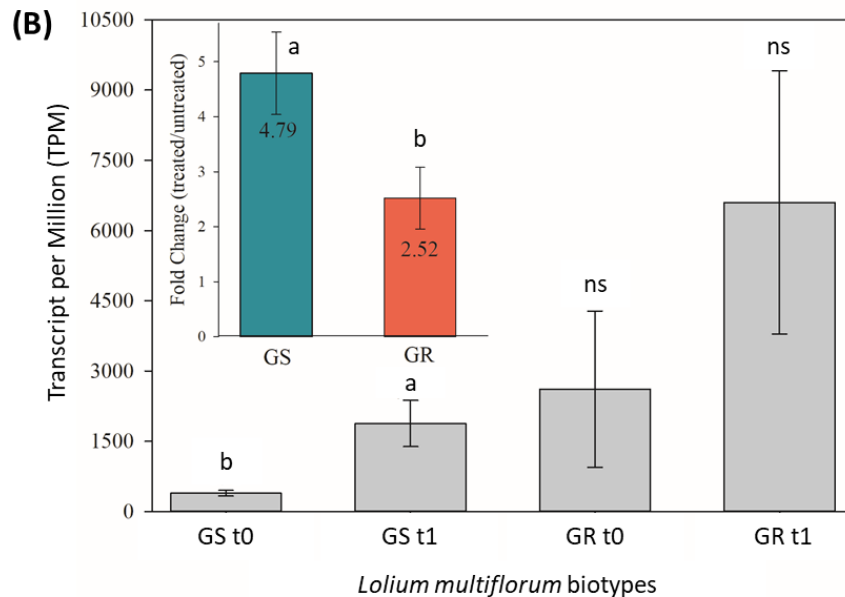

**Supplementary Figure 4.** Partial sequence alignment of the EPSPS transcripts and amino acid sequence assembled of transcriptomes from glyphosate-resistant (GR) and -sensitive (GS) biotypes compared to <sup>1</sup>EPSPS sequence of the *Arabidopsis thaliana* (GenBank: CAA29828.1); <sup>2</sup>EPSPS sequence of *Lolium multiflorum* (GenBank: DQ153168.2); <sup>3</sup>EPSPS sequence of *Zea mays* (GenBank: AF349754) (A). The grey-colored boxed amino acids show no substitution at positions Threonine 102 and Proline 106. Transcriptome expression levels (transcript reads per million mapped reads - TPM) of the EPSPS in GR and GS biotypes in response to glyphosate treatment and differential expression ratio (Fold change) (B). Different letters indicate significant gene expression or ratio (fold-change) in response to glyphosate treatment in each biotype by the t-test while ns means non-significant at  $p \leq 0.05$ . GR: glyphosate-resistant biotype; GS: glyphosate-sensitive biotype. t0: without glyphosate treatment; t1: with glyphosate treatment.

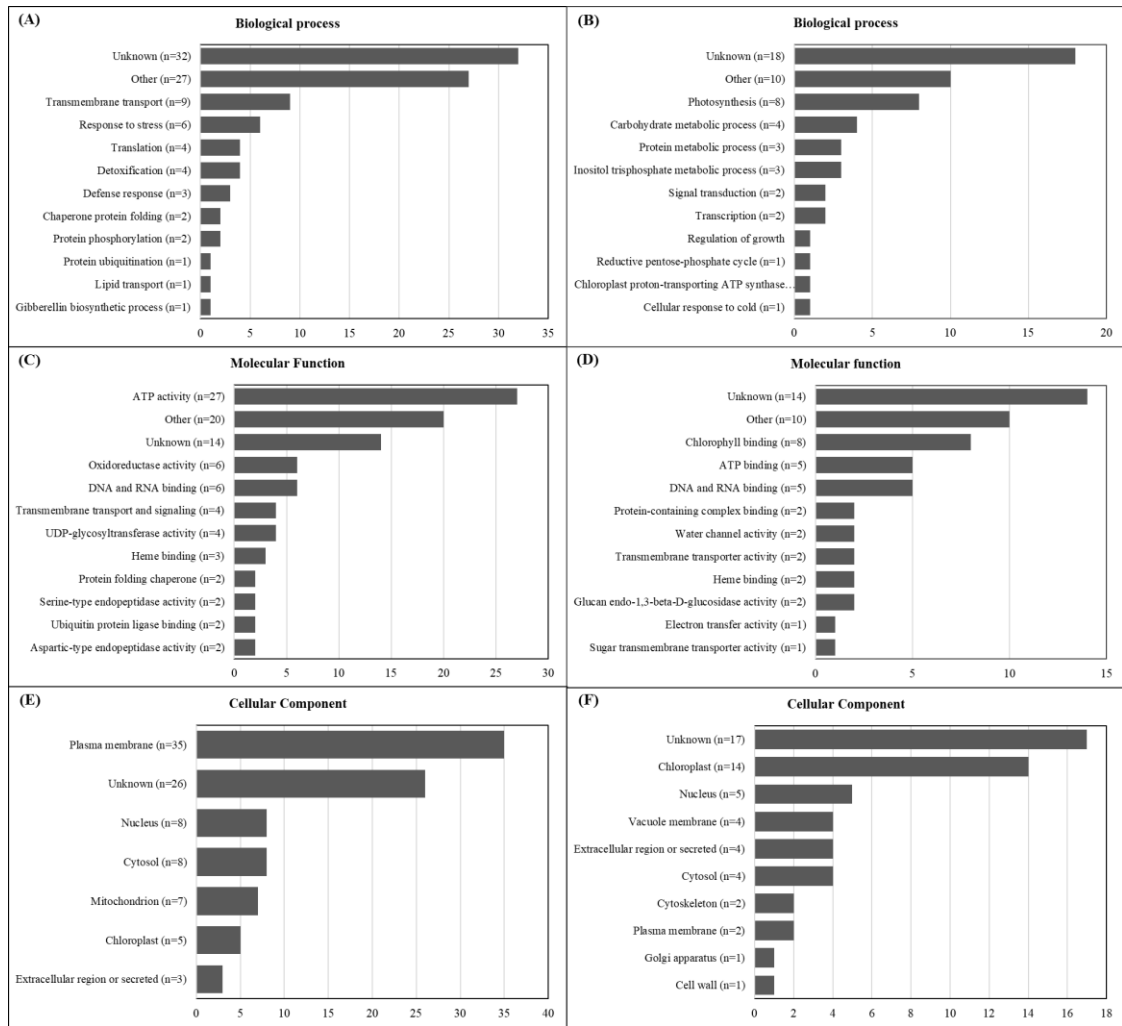

**Supplementary Figure 5.** Summary of top twelve gene ontology (GO) terms identified as up- (A, C, E, n=92) and down-regulated (B, D, F, n=54) genes (DEGs) in glyphosate-resistant (GR) biotype of *L. multiflorum* transcriptome in response to glyphosate treatment. Annotated sequences were classified into the biological process, molecular function, and cellular component.

**Supplementary Table 1.** The gene expression results of qRT-PCR (relative gene expression) and RNA-Seq (fold-change) in response to glyphosate treatment in glyphosate-resistant (GR) and -sensitive (GS) biotypes of *Lolium multiflorum* used to validate the transcriptome dataset.

| Contig ID             | Uniprot ID        | Functional Annotation              | Putative Localization | Fold-Change <sup>1,3</sup><br>(qRT-PCR) |       |                    | Fold-Change <sup>2,3</sup><br>(RNA-Seq) |       |                    |
|-----------------------|-------------------|------------------------------------|-----------------------|-----------------------------------------|-------|--------------------|-----------------------------------------|-------|--------------------|
|                       |                   |                                    |                       | GR                                      | GS    | Ratio<br>GR/GS     | GR                                      | GS    | Ratio<br>GR/GS     |
| <b>DN139722_c2_g6</b> | <b>A0A3B6R885</b> | <b>EPSPs</b>                       | Chloroplast           | 21.9                                    | 47.8  | 0.46 <sup>ns</sup> | 2.5                                     | 4.8   | 0.53 <sup>ns</sup> |
| DN124328_c1_g1        | A0A0C5AYW1        | Cinnamoyl-CoA reductase            | Unknown               | 6.7                                     | 6.5   | 1.02 <sup>ns</sup> | 30.2                                    | 23.8  | 1.3 <sup>ns</sup>  |
| DN141928_c1_g1        | R7W5T0            | ABC transporter family member 2    | Membrane              | 2.2                                     | 4.01  | 0.54 <sup>ns</sup> | 1.8                                     | 3.5   | 0.52 <sup>ns</sup> |
| DN135064_c0_g4        | M8BDG0            | Cytochrome P450 78A3               | Unknown               | 0.12                                    | 0.03  | 4.0*               | 0.034                                   | 0.006 | 5.5*               |
| DN106797_c0_g1        | Q25C92            | Glycine-rich RNA-binding protein   | Unknown               | 0.19                                    | 0.14  | 1.4 <sup>ns</sup>  | 0.15                                    | 0.11  | 1.4 <sup>ns</sup>  |
| DN101887_c3_g1        | A0A1D5UUS0        | Rubisco                            | Chloroplast           | 0.26                                    | 0.29  | 0.9 <sup>ns</sup>  | 0.09                                    | 0.10  | 0.91 <sup>ns</sup> |
| DN125475_c1_g1        | M8A3A2            | Glutathione S-transferase GSTU6    | Unknown               | 50.3                                    | 54.2  | 0.9 <sup>ns</sup>  | 18.7                                    | 17.5  | 1.1 <sup>ns</sup>  |
| DN134465_c0_g2        | M8CQB9            | Heat stress transcription factor   | Nucleus               | 6.1                                     | 8.5   | 0.7 <sup>ns</sup>  | 2.1                                     | 4.2   | 0.5 <sup>ns</sup>  |
| DN110372_c0_g1        | A0A287F0A7        | Auxin-responsive protein           | Nucleus               | 0.47                                    | 0.22  | 2.1*               | 0.13                                    | 0.10  | 1.3 <sup>ns</sup>  |
| DN124884_c0_g1        | Q8L686            | Adenosine diphosphate glucose      | Unknown               | 0.17                                    | 0.04  | 4.2*               | 0.05                                    | 0.008 | 6.2*               |
| DN140736_c3_g2        | A0A1D8MIX5        | ABC transporter family member 4    | Membrane              | 42.7                                    | 6.5   | 6.6*               | 28                                      | 3.7   | 7.5*               |
| DN116297_c0_g3        | A0A287E7I0        | Protein detoxification             | Membrane              | 275.5                                   | 163.6 | 1.7*               | 78.9                                    | 82.1  | 1 <sup>ns</sup>    |
| DN139321_c2_g2        | A0A1E5UIT3        | Histone-lysine N-methyltransferase | Unknown               | 141.5                                   | 122.6 | 1.1 <sup>ns</sup>  | 75.5                                    | 65.4  | 1.1 <sup>ns</sup>  |

<sup>1</sup> Relative expression compared to the average of two internal control genes – 18s and eEF1As. <sup>2</sup> The transcriptional fold change of transcript per million (TPM). <sup>3</sup> Data for the GR and GS biotypes are expressed as the ratio from glyphosate treated to untreated individuals. \* means significant and <sup>ns</sup> non-significant by F test ( $p \leq 0.05$ ). The genes were randomly selected from the gene list to provide a range of gene expression, except for EPSPs. Two biotypes originated from the same geographical region (São Valentin, RS, Brazil) were used, one GR and another GS.

**Supplementary Table 2.** Candidate reference genes for normalization of qRT-PCR in *Lolium multiflorum* glyphosate-resistant and -sensitive biotypes in response to glyphosate treatment.

| Gene          | Primer Sequences <sup>1</sup>                              | Reference                |
|---------------|------------------------------------------------------------|--------------------------|
| <i>18s</i>    | F- AACACTTCACCGGACCATTCA<br>R- CGTCCCTGCCCTTTGTACAC        | Zhang and Hu (2007)      |
| <i>GAPDH</i>  | F-AACTGTTTCATGCCATCACTGCCAC<br>R- AGGACATACCAGTGAGCTTGCCAT | Wan et al. (2010)        |
| <i>TUA5</i>   | F- GGCTTGTGTCTCAGGTTATCTCATC<br>R- CATGGAGGATGGCTCGAAGG    | Clarke and Rahman (2005) |
| <i>eEF1As</i> | F- CCGTTTTGTCGAGTTTGGT<br>R- AGCAACTGTAACCGAACATAGC        | Lee et al. (2010)        |

<sup>1</sup>Forward (F) and Reverse (R) primers.

**Supplementary Table 3.** The primers for 13 genes used for qRT-PCR analysis in *Lolium multiflorum* glyphosate-resistant and -sensitive biotypes in response to glyphosate treatment.

| Gene Name                                 | Sequence Primer                                       |
|-------------------------------------------|-------------------------------------------------------|
| <i>EPSPs</i>                              | F- GCCGAGGAAACAATCAACAT<br>R- GCAGGTTTCCGATTGAGAAG    |
| <i>Cinnamoyl-CoA reductase</i>            | F- GGTCCGCAAGACATACG<br>R- GGGTACTCCGGGAAGAGC         |
| <i>ABC transporter family member 2</i>    | F- GGGAAGCACAACACTGAAATC<br>R- CAGGTTGTCTTAGACGGTTGC  |
| <i>Cytochrome P450 78A3</i>               | F- TGCATGAGTTCGAGTGGATG<br>R- CAAAACGGGACACTACACA     |
| <i>Glycine-rich RNA-binding protein</i>   | F- CGCTCTTCATCGACTCGGA<br>R- GCAATGGCGGAAGAGTACC      |
| <i>Rubisco</i>                            | F- CGGTGGCAGGTAGGAAAGG<br>R- CAGGGCCTCAAGTCCACC       |
| <i>Glutathione S-transferase GSTU6</i>    | F- GGAGGACTCACAACAGGCT<br>R- GGAGGAGACGATGTGAAGCT     |
| <i>Heat stress transcription factor</i>   | F- GCTCAACGGGATCAGAGGT<br>R- GGCGATGAACATGTCCCATG     |
| <i>Auxin-responsive protein</i>           | F- GCTCAACGGGATCAGAGGT<br>R- GGCGATGAACATGTCCCATG     |
| <i>Adenosine diphosphate glucose</i>      | F- GCCGTGGTAGTAGAAGTCCC<br>R- GCTAGCACACACAGAGTAGC    |
| <i>ABC transporter family member 4</i>    | F- GCTTGTTCGGCGCTTGTC<br>R- CGGCTATCTTCACCTCTTGC      |
| <i>Protein detoxification</i>             | F- CGTTCTACTTGGCAGGCATC<br>R- GGCTACCACAACTATGCCG     |
| <i>Histone-lysine N-methyltransferase</i> | F- GCCCAGGAATACTATGATGAGC<br>R- TGTTAAGACTGTGTTGCCGCG |

## SUPPLEMENTARY SEQUENCES

**ABC transporter A family member 7 - ABCA7 - TRINITY\_DN140736\_c3\_g2; len=359**

GCAAAAGAGCTGAAAGGAAGATATGGGGAACTACGTGTTCAACATGACAACATCTTCGGAACATG  
AACAGGAGGTTGAACAGCTTGTTCGGCGCTTGTCCGAAGTGCAAACAGGATATATCACATATCTGGA  
ACACAGAAATTTGAGCTACCAAAGCAAGAGGTGAAGATAGCCGACGTTTTCCATGAAGTTGAGCATG  
CAAAAAGCCGTTTTAGCATAACGCTTGGGGCCTCGCTGACACCACCTTGGAGGATGTCTTCATCAAG

GTTGCTAAGGGAGCACAAGCATTCAATGAAAACGTGTAAGTACTAGTACTATCCGATTTCGTAGGTGATTAT  
TCTTTTCCTTTGTGAAGAAAT

**Cell wall integrity and stress response - WSC2 - TRINITY\_DN134601\_c1\_g3; len=420**

CGTCCACTGGGTGCCACGTCAAGGTCAGGACGTGGGCGAAGCTGGTCCAGCTCAACTTCCTCAGGCA  
GTACCTTGGCGACGAGGGCTTCGCCGCCATTTTCAGCACAACCGGCCACTCTTCCGGGACACCTTGG  
GACTCAACAGGGCTGCCGGCGGCGCCGAAGAAGAGGACCTCCTCACGGCACAGGAGAAGAAGCAGC  
TCAGGAACGACAAGGACAAGCAGCGGACCAAGGACATCAACAAGGATCGACGGAATAAGAACACA  
CAATATTGATGACTATGGGCGCTCAATTATCTGTTCTTCAGCTTTCAGAGAGATTGTAATTTCTTTAT  
TTGTAICTAATTGTAGTGTGTTGTTGAGATGGATTCCATGTTTCATCTTTCTATATGAATGCATGTTTTGTT  
GTTTAAAAA

**COBRA-like protein 7 – COBL7 – TRINITY\_DN140896\_c3\_g3; len=218**

CCGCAGGTGTAGTCCGGGTTGAGGGAGGAGCCGCCGGCGATCTTGAAGTTGGCCGGCGGGAAGAGCT  
TGGTCTGTTGGTGTCCGGCGGCATCTTGAAGACCTGGATTGGAAGCGGATTTGGACTGGGAGGCG  
TCCATGGACTTGGGCAGGATGGTGCCGTTGCGGCAGCAGTGGTTGATTCTCCCCATTTCCGGTGTCTTG  
TAGCGGGAGAGCGG

**Fe2OG dioxygenase domain-containing protein - TRINITY\_DN138383\_c1\_g1; len=674**

GCTGAAACACACCGTTCGATTGTATCTTATTACAGGTATCATTACAATGTTATGCATGCCACACTTCCGA  
ACACACCGTGTCTTTGCCATGTATCATTACAATTTATGACACATTTACCTTAACACACCGCATGGTTA  
AAAATAGAATGTCTGACACTTTTGCCTAGGATGACCATGCTATGGCAGGTTTTGAAGATAATGTGTCA  
AACTTTTCCTTTTTAGCCATGCGATATGTTCTAACAATGTGACACAAAATTGTAATAATACATGACAT  
AGATAAATCGGGTAGTTTGTTCGTAACGCTAGAAAATAACAATTTCCCTTAAATCAAAGGACCC  
ACAATTCATCATGAAAAATAAAAAAGAAAGATCCCTAATTCCGAGCCATCAAATCAAACGTGGTTGA  
ATGTCTCGCATGGTCTGGCTCCAACAACCTTGTATTTTCATATCAATTTGCTTGATATATATATCAGCA  
CATATATACTACGGTACTACTAATAACCGCCGTTATTTATATCACACAAATGACGACATGGTACTAC  
ACGATGGGCTTGAGTCTTCTGAAATGCGCGATCTGGACGTTCTCGACGGCGAGCTTCTGAAGTTG  
CTGCTTCTTGGTTCTGAAGAAGGCGCCCAATTGTATGCCCTGTACCTGGGCGG

**Gibberellin 20 oxidase 2 - GA20OX2 - TRINITY\_DN112601\_c0\_g2; len=350**

GGTACTACGAGTCGGAGCACACCAAGAACGTCAGGGACTGGAAGGAGGTGTTTCGACCTCGTCCCC  
GCGAGCCTCCGCCGCCCGCCGCGGTGTCGACGGCGAACTCGTGTTCGAGAACAAGTGGCCCCAGGA  
CCTGCCTGGATTACAGAGAGGCACTGGAGGAGTACCGAAGGCGATGGAGGAGCTGGCCTTGAAGCTG  
ATGGAGCTGATCGCGCGCAGCCTGGGGCTGAGACCGGACCGGCTGAAGGGCTTCTCAAGGACGACC  
AGACCACCTTCATACGGCTCAACCACTACCCGCCCTGCCGAGCCCCGACCTCGCGCTCGGCGTCCGC  
CGCCACAAGGACGC

**Glucan endo-1,3-beta-glucosidase - GLC1 - TRINITY\_DN137545\_c0\_g2; len=230**

AGTCCGAGGTCGTACACAGGCGTGAAGTCCGGATTGAATAGCCAAAGTGCCTCTCGGCGATTGGGC  
CCGGCTTCTGGTTCTCGTCGAATAGGGAGAAGAGGTAGGTCTCGAATTTCTTCCCCGGCATGAGCGC  
GTGCCCTTCCGCTGCTGCAGACCCGATCATGCCGTCGTTGAAGTCCCTGGCTCCTTACCCCCGACG  
CCGATCTGGCCCCGCTCGGCCTGCGT

**Glycosyltransferase UDP UGT13248 - TRINITY\_DN130084\_c1\_g4; len=211**

GGTGCCTCAACTTGAGGTTCTGTACACAAGTCCATCGGTAGTTTCGTTACACATTGTGGATGGA  
CGACATTGGAAGCCGTTGCTTGTGGCGTGCTCTCGTTGGGATTCCACATTGGGCGGACCAACCCACT  
ATTGCAAAGTACGTTCAAAGTGTATGGTGCATGGGTGTACGAGCACAACCAGGTGAAAATGGATGGA  
TAAAGAG

**Glycosyltransferase UDP 79 UGT79 - TRINITY\_DN125138\_c7\_g3; len=442**



GCCGCGGCGGGCACGCCAGCCGCTCGCGCCACCCGAGCGCCACACCAGGAGAGGGTCGTACACC  
AGCACGCGCACTGGCCGCCCTGCGCGCCTCCGACAGGAGGAGTCCCGTAGCGTCTCGGACCCCA  
CGGCTCCAGCCGGACATGTACTTCGCGATGTTCCGGGACGAGGCGCCGCCCGGGCTCGAAGCC  
GTCGGAGATGGCGGCCACACCGAAGGGGTCCCGGGGGGGCGGAGTGGTGGAGAGCACGTAGCGGGT  
CGCGACGAGGGTGGGGCGGAGGCCGTGATAGGGCAGGCGCTGGCCGAACTGGAGCATTGGGTTGGTG  
TGCCCCTGCGCGCCCGGAACGGCAGGAAGAACACATTCCCGCCGCCGCTCGCCGCTCCATGGC  
TGACGCTCTCGCTGGTGGTGATTGTGGTCTCCATGTTCCGG

**Glycosyltransferase - TRINITY\_DN123097\_c0\_g1; len=623**

GTTGGCTGGAACAAACCTACTGAAAATCGATTAACACCTTCGCTGCTCTCCAAACACTGACCAGCCTA  
CAGAATACACAGATCACTCAATTGGATACACCGACTGCAAGCATTGTGGAAGAGAAGCCAACCTCAT  
ACGTGCAACTGAGTTGTTTTACTGATAGTAAGACCAATTGTCATCAGATGTAGACTTATTTTTATTTGA  
GCGAACTCAGAATACATAGTACTGTATTATTGTAGTATGAAACACTGATCAGCGTAGAATATCGTCAC  
GACCTCGCCGCAAGATGCATATAGCAAACCTTGATCGATGTGAAGCTACAAGATGCCAACGCTATCTG  
CTAAAATTTCTTATCTGGAGCTGGTGGCGTCATGGTGTGAGGCTAAGCTCGTTGAGGAAGCCACG  
AGCCGCTGAACTCCTCTTGACGAGCCACCCCTCGGCAATGTCCCGCCTCACCTCCAGCGCCAGCGC  
CTGAGCGGACCTCCTTATCTCCTCGACTCCATGGCTTCGTCACCATCCTTTCCACGACGGCCCTCTC  
GCACACGTCCTTCATGTCCAGCCCTGCTCTCCACACTTCGCCTATGAACCGGCTGTTGGTCTGCTGGTC  
GGCGAAGA

**Subtilisin-chymotrypsin inhibitor - WSCI - TRINITY\_DN111587\_c0\_g1; len=641**

CGGGAAGAAAAGACAGTAAGTGTGTACATTTTTACGGTGCATGGAAATCATATTTCTAAGTTCCAAA  
CATTCCAAGAAAAGTGTGGCATGCAAAGTTAAATCTTTAATATGATTATTTGTGATCCGTAAAAAAAT  
AAAAAATACTTTGTGTTTCCAATCCACAATATAAACCTTGCTTGTATGATATATAGGTCTTAGTTAAGA  
TTTATTCCAATGGAAAAGACCACATTATTCATGTATCGATATATTTAGGTGCATGTATAATATCGTTG  
GTAACACACACAGTAAGCATGAATCATGTCGAGCTAGCACACTCGCACGGCATGATCAATCAAGCTT  
GCTAGCCTAGCCGATCTTGGGGATCTGGGCGACAACATTGGAGGAGTTGACGAAGACGCGGACACGT  
TTGGGGTTGAATTCGCCGGTACGAAGGAACCGACGGGCAGCACGATCACGTTACGCTCTGGGCGGT  
CACTAAGGATCTTCGCTTCGCCGCTCAGACGACCGCCGTAACAGCTCCGGCCACGAGGACTTGGA  
TCACCCATTTTCGAAAATCTGAGACCTGAAAATTTGCAACTGGCTGTATTTGCGGGTGAATTAAGTGA  
ATTAGCCTGTGGTTTGGTTTGGCTGATTG

**Sulfate transporter 1.2 - TRINITY\_DN135754\_c1\_g1; len=848**

GACAGGAATATCTTGTCTGCCCAATGAGGTCAGTGAATTTTGGCGCCCGCAGCTTCTGGATTACTATT  
GGCCCGGATTGGCGAGGACCAGCTGAATTTTGCCTTTTCGAGTGCTTTTAGCAATTCCTCCAAGGCA  
TGGATTCCGCTTGTGTCGATGTCAGTTACCGGAGATAACTCAACAATCAGAACTCTGTTTTGACAGC  
TTCTGCTCTTCTGTTGTTCTTCTCATCCCTCAGCCATCTCAGGATCCTCTCTTTAACATAATTGGAGTT  
CGTGAAGTAAATGGCCGAGTCCACTCTTACAATCAGAACCCCGGGCACCTTGGTAGCTTCCGTGTATT  
GTTCAACATTCCTATAGATCGTTGTTCTTGGAAAGGTTACCAAGTAAAGCTGTTCTCGGCCGTGTTACTTG  
AAGAAGAATCTTGCCAAGAGATATTGCAACCGCAATGAGCAAGCCGTACTCCACTGATGCAAAATATA  
ACCCCGAAGAATGCTCCTAGGCAGGCCACAAAGTCCATTTTATCAACCTTCCAGAGAAGGTAGGCAG  
CCTCAAAATCAATCAGTCCAAGCACTGCGTTTATGATGATGGAAGCTAGGATGGCATTCCGGCGTAC  
TTAAACAACGGAGTGATCAGCAACAGTGTGAGCATTACTACAATTGCCATAACGACATTGGATATTGC  
TGTTCTGCATCCAGCCATGTAATTCAGTGTGATCGTGAGAAAGAACCTGTTGCTACATAGCATGAAGT  
AAATGAACCTACAATGTTTCATGGTTCCTAGAGCCACCATTTCTTTGTTACCATCTATTTGATAGTCTTC  
ATGGCAGCAAATGTTCTTCCAAT

**Ubiquitin - TRINITY\_DN120520\_c4\_g4; len=237**

AAGAAATTAGACGCAGAAAATCAACCGCAGTTCATCAAGATGCAGATCTTCGCCAAGACGCCGACGG  
GGGAAACCATCACCTCGAAGTCGTGGACAGTGACACCATCGCCAGCGTCAAGGCCAAGATCCAGGG  
CAAGGAAGGTATCTCGCCGGACCAGCAGCGCTCATCTTCGCGGGAAAGCCGCTGGAGGATGGCCG  
ACCCTCGCCGACTACAACGTCCTCAAGCAGTCCACG

**Ubiquitin-60S ribosomal protein L40-2 Ub-CEP52-2** – TRINITY\_DN123915\_c1\_g2; len=251

AGCAGCTGGAGGACGGGCGCACCCCTGGCCGACTACAACATCCAGAAGGAGTCGACGCTGCACCTCGT  
GCTCCGCCTCCGCGGGCCACCAGGGGCGGCTACATCATCCAGGAGCCCAGCCTGCTGCAGCTCGCTC  
TCAAGTACCGGGAGAAGAAAATGGTCTGCCGCAAGTGCTATGCGCGGCTTCCCTCGAGGGCGACCAA  
CTGCCGCAAGAAGAAGTGCGGCCACACCAACCAGCTCAGGCCCAAGAAG

**Uncharacterized protein** - TRINITY\_DN141149\_c4\_g5; len=217

TCGCCGGCGAGGTGGCCCCGCTGCGACGTCCTTTCCTGCCACACGCCGCCGGAGGGCTGAACCCCGC  
GGCATATGTCATCGTCGCCACCAGCGTCGCCAGCAGCAGGATGTACTTGCTCAGGTCCAGCATCAGCT  
CGTCGCTTTTATCTCTTCTGCACATCTGGGAGGGTACCTTCAGGTGGCGGCTGAGCGTCCAACGACG  
CGAGCTCGACGT

**DAO domain-containing protein** - TRINITY\_DN134059\_c0\_g2; len=398

GTGGTTGTCGGTGCCGGGTTCTCGGGGCATGGCTTCAAGATGGGGCCGGCGGTAGGGAAGATCCTGGC  
CGAAATGGCGCTGGACGGCGAGGCAAGGACGGCCGCGGAGGCCGGCGTGGAGCTTCGACACTTCAG  
GATCGGCCGGTTCAAGGGCAACCCGATGGGGAATGCCATGAGTTTCTGAGATGAAATTATGAAACTG  
ATCTTTATGCGACCGTCGGAATTGATATTGGTTTGTGTTTGTACAGCTTGTCCAGTGTTAATGTGATAT  
GCACAACTTTTATGTGATTTTATGGTCAATATTTTCATGATTTTTTGAACGCACGTGACATACTTTTTCT  
ATATCGCAAATATTTTGTTTTTGATATTAATTCACTTAAACTTTTAAAAAGTTGAC

**Glycine-rich cell wall structural protein - GRP** - TRINITY\_DN119890\_c0\_g2; len=307

CATCCATCACTTGCACACTGAAGAAGATGGTGTCAAGCATGGCGTCCAAAGGTCTCATTGTGTTTCGCT  
CTCCTGCTTGCGGCGGCTTTCCTCGTCGCCACGGCTGAAGAACTCGTGAGCTAGCGCAACAAATTCTT  
TACCGATTTCGTTATAGACTACGGTGTAGACTAGGCATATATACGATCACCATGAGAACTCCTGCTGCT  
ACTAACTTGCATCTATGGATACATTTTTTGTTCATGCAGAGGCTAAGAAGGAAGAGGCCAAGGCTGGCG  
TGCAGGGCTACCACGGCGGCGGCGGAGGCTACTA

**RNA polymerase sigma 10ator** – TRINITY\_DN137034\_c0\_g1; len=375

CAGTTTGGCAGGATTTATGAGGACATGTCTTCTGGATGGATGTGGCTTACACAAGCAGCAACAGTTT  
GGAGTACAACCTGTTGATGCAAAACATCCATGTCTTGGAGAGTAGTTTGGCTGGCCAAGATTTGGTAA  
CTCTGGAAAGAGACATCCTTGTACATATGGAACAACCTTGGAGCTCTGAAATGGTTCAACGCGACCAG  
GTCCAGGGCTACTGTTACACAAACCACATATGAACCAGATTTTGCATGCTTGGAAATGTTACCGAAT  
CTGGTCCCATGACTAGTCCTCTCGAGGAGCAAAGCGATGATCAACTGGTCATTTCGGAGCGGGAGAAG  
CCAGGAGAGGAACTGAAGAGAATTAGAGCGTCCGAG

**Senescence-associated protein - DIN1** - TRINITY\_DN136212\_c1\_g1; len=239

CTCCAGGCAGAGAACCCCTCCTGCGATGTCGGTCACGGCAGTGAACCCCGCGGAGCAGAGCTCAGCTG  
CCGCCATGAGAGACCTCCTGCCACTCTGGCATCCGATGATTATCTCGGCCTCCCTCCAAAGATCGCC  
GACACTTGCTCTACAAAATGCGAGTTCTTCGACATCCCTGAGCCCGTCTGTACATGTAAGGGATGTT  
ACGGCTCCTGCGGGGTGCCCGGCCGCGAACTCACT

**Transcription factor - HBP-1b(c1)** - TRINITY\_DN134440\_c0\_g3; len=1145

ATTACCAACTTGTCGAATAAATTGAAAATATGACATGATTCTGAATCAAACCTCTCATCAATACAACATT  
GTGAAGAATCTAGGGAGTAGGGAGCGCCTGATTTCTATGGGGCTAATACAACACAGTACCTAATAA  
CAATATCCTATTTATGAACTTATTCAATTTATTCCCGTGGACGGGCATGCCAAAGGGAACCTCAAAGCG  
CGTAGCCGGGAGAAGTAGTCACTTATTGCAAGCAGAGCTCGTGCAGATTGGCGAGTGGTTAATATGCC  
TTGCAGTTGCTGAAGGGTTTGCAGCCGAGATTATCAGCCTGCCGTAGGAAGTTTTCTAGTGTTCGAAG  
TTTTCCCATAGCCATTGCCATCTGTCCCATGTAGTTTGAACATTGCCAGAAGATCCTGCAGGGCCCAG  
GGATCCAGATGCTAGGGTTTCTGCGAGCGACTGTTGTAGTGCCTCCATGCCTTGAGAAAGAGCATCTT  
CAGCTTGTGAGAGGACTGTTGCAGGTTGCATACGCCTGTAAGCTGCTGCTCAGTAAGAGGTTCTAGTT  
GACCTCCAGTAACTTAAGGAGCTCAGATGATTTGAAGCCACCTAACCACATGAAACACCTCTCGGCA  
GGGTCTGCCACATTCCAGACAGCACATGGAAAACATCTGCTTTGGCTGCTACACCCTTGAGCCTGAA  
AAATTCATCATAGTGTCCATGATGCTGTCAACAATACTCCGAAGATCGTCATCACCAGCATGTGCGT

TGATTGCGGCCCTCAATTCATTTATATGCTTGTTATGTTCCCTCCAACCATCGTGCATACTCCATGTCAAA  
TGCCATAGCACCATTTCCACTCGGTGGGTGAGCTTGATCTCCTGACGATGAAATAAAAAATACCCTGTT  
GCCGCGCCCGTTGAAGCTCTTGCTCTAACTTAGTAAGTTTCAATCTACTACTCTCAAGGTTTTGGACAT  
ATGCCTTCTTTCTTAAACGGCTTTTCCTAGCAGCTTCACGGTTTTGTGCAAGACGGCGAAGTGACTTGT  
GATCTAATTTGTCCTTTGATTTATCACTAGAATCAGAAGCTGTGGGAGCAGCAAGCTGTCCTTGTTCAA  
ACTGTTAAGCAGATAACCATTAAACCAATATGCTTTGGTATAAGCTGAT

**Uncharacterized protein – TRAES\_3BF019300240CFD** – TRINITY\_DN124989\_c0\_g4; len=209  
CTGGGCCTCCTCGACGCCGACGAGAGCCCCGACGACGGCGACCTCTTCTTCTCCCCTGCGCGGAACAA  
CCTTGAAGGCGCAGTGATGAAGGAAGAAGCGGCCGGAAGAAAGCCGGAGGAGCTGAGGTGATGCC  
TTGGGGGATCGAGAAGTGGTGGCGGACGCACGTCACGGTGCCGGAGGTCCCCAAGTACGCGGAGAA  
GGCCCTAA

**Vacuolar protein sorting-associated - VPS60-1** - TRINITY\_DN127114\_c0\_g3; len=590  
AAGCACAAGCGCATGTACGAGGATCAGCGCAACATGCTCTACAACCAGACCTACAACCTCGACCAGG  
TCGGCTTCGCCGCCGACGGCCTCAAGGACGCCAGACTATGAATGCTATGAAGGCGGCAAACAA  
GGAGCTTAAGGGGATGATGAAAACCGTCAAGATCGAGGATATCGATAATATGCAAGATGAAATGACG  
GATCTGATGGACGTGAGCAACGAAGTACAAGAATCTCTCGGTAGAAGCTACAACATCCCCGATGATG  
TTGATGAGGAAGAGCTAATGGGAGAGCTGGATGGTCTGGAAGCTGATATGGAGTTTGAGTCTGCTGCA  
GTCCCGTCATATCTTCAGCCAGACGAGGAAGCTGATATTAACCTGCCCACTGCACCGACTTATCCTAC  
AGCAGTTCCAGTAAACAGGCACCAGGAGGATGAGCTAGGACTGCGAGCGGTACCTCGAGCATCACTC  
CGTAGTTAGAAGTATTTGCGTGTGTTGTTCTTAGTGCTACCTGTTGTTAAGGTGATGTTAAGAAGCCT  
TTGGTCTGTGCTTGAGCAATCCGTCCATGTA
